# Supplementary material
Source: HighWire-hosted journal article supplement (http://www.qdcxjkg.com/highwire/filestream/114016/field_highwire_adjunct_files/0/ERJ-02042-2012_Disclosure.pdf)
Supplement: ERJ-02042-2012_Disclosure.pdf [file ERJ-02042-2012_Disclosure.pdf]

**K. Mortimer** has received a grant for an investigator led study from GlaxoSmithKline. He has also received speaker fees from GlaxoSmithKline and AstraZeneca. In addition he received travel reimbursements from GlaxoSmithKline and AstraZeneca to attend both European Respiratory Society and American Thoracic Society conferences.
